# Supplementary material for: Multi-study Integration of Brain Cancer Transcriptomes Reveals Organ-Level Molecular Signatures
Source: PubMed Central journal article supplement (PMC3723500; doi:10.1371/journal.pcbi.1003148), 2013-07-25
Supplement: pcbi.1003148.s007.pdf [file pcbi.1003148.s007.pdf]

**Supplementary Table 2.** GEO microarray sample IDs used in this study.

| Phenotype Name          | Phenotype Label | GEO Accession Series # | GEO Microarray Sample ID                                                                                                                                                                                                                                                                                                                                                                                                                                                                                                                                                                                                                                                                                                                                                                                                                                      |
|-------------------------|-----------------|------------------------|---------------------------------------------------------------------------------------------------------------------------------------------------------------------------------------------------------------------------------------------------------------------------------------------------------------------------------------------------------------------------------------------------------------------------------------------------------------------------------------------------------------------------------------------------------------------------------------------------------------------------------------------------------------------------------------------------------------------------------------------------------------------------------------------------------------------------------------------------------------|
| Ependymoma              | EPN             | GSE16155               | GSM404936,GSM404937,GSM404938,GSM404939,GSM404940,GSM404941,GSM404942,GSM404943,GSM404944,GSM404945,GSM404946,GSM404947,GSM404948,GSM404949,GSM404950,GSM404951,GSM404952,GSM404953,GSM404954                                                                                                                                                                                                                                                                                                                                                                                                                                                                                                                                                                                                                                                                 |
|                         |                 | GSE21687               | GSM541060,GSM541061,GSM541062,GSM541063,GSM541064,GSM541065,GSM541066,GSM541067,GSM541068,GSM541069,GSM541070,GSM541071,GSM541072,GSM541073,GSM541074,GSM541075,GSM541076,GSM541077,GSM541078,GSM541079,GSM541080,GSM541081,GSM541082,GSM541083,GSM541084,GSM541085,GSM541086,GSM541087,GSM541088,GSM541089,GSM541090,GSM541091,GSM541092,GSM541093,GSM541094,GSM541095,GSM541096,GSM541097,GSM541098,GSM541099,GSM541100,GSM541101,GSM541102,GSM541103,GSM541104,GSM541105,GSM541106,GSM541107,GSM541108,GSM541109,GSM541110,GSM541111,GSM541112,GSM541113,GSM541114,GSM541115,GSM541116,GSM541117,GSM541118,GSM541119,GSM541120,GSM541121,GSM541122,GSM541123,GSM541124,GSM541125,GSM541126,GSM541127,GSM541128,GSM541129,GSM541130,GSM541131,GSM541132,GSM541133,GSM541134,GSM541135,GSM541136,GSM541137,GSM541138,GSM541139,GSM541140,GSM541141,GSM541142 |
| Glioblastoma Multiforme | GBM             | GSE 4412               | GSM99432,GSM99434,GSM99436,GSM99438,GSM99440,GSM99442,GSM99444,GSM99446,GSM99448,GSM99450,GSM99452,GSM99454,GSM99456,GSM99462,GSM99464,GSM99466,GSM99470,GSM99472,GSM99474,GSM99476,GSM99478,GSM99480,GSM99482,GSM99484,GSM99486,GSM99488,GSM99490,GSM99492,GSM99494,GSM99524,GSM99526,GSM99528,GSM99530,GSM99532,GSM99534,GSM99536,GSM99538,GSM99540,GSM99542,GSM99544,GSM99546,GSM99548,GSM99550,GSM99552,GSM99554,GSM99556,GSM99558,GSM99560,GSM99562,GSM99564,GSM99572,GSM99576,GSM99578,GSM99580,GSM99582,GSM99584,GSM99586,GSM99588,GSM99590                                                                                                                                                                                                                                                                                                            |
|                         |                 | GSE 4271               | GSM96950,GSM96951,GSM96952,GSM96953,GSM96954,GSM96955,GSM96956,GSM96957,GSM96958,GSM96959,GSM96960,GSM96961,GSM96962,GSM96963,GSM96964,GSM96965,GSM96966,GSM96967,GSM96968,GSM96969,GSM96970,GSM96971,GSM96972,GSM96973,GSM96974,GSM96975,GSM96976,GSM96977,GSM96978,GSM96979,GSM96980,GSM96981,GSM96982,GSM96983,GSM96984,GSM96985,GSM96986,GSM96987,GSM96988,GSM96989,GSM96990,GSM96991,GSM96992,GSM96993,GSM96994,GSM96995,GSM96996,GSM96997,GSM96998,GSM96999,GSM97000,GSM97001,GSM97002,GSM97003,GSM97004,GSM97005,GSM97006,GSM97007,GSM97008,GSM97009,GSM97010,GSM97011,GSM97014,GSM97018,GSM97021,GSM97024,GSM97028,GSM97031,GSM97032,GSM97037,GSM97040,GSM97041,GSM97042,GSM97044,GSM97048,GSM97049                                                                                                                                                   |
|                         |                 | GSE 8692               | GSM215420,GSM215422,GSM215423,GSM215425,GSM215426,GSM215427                                                                                                                                                                                                                                                                                                                                                                                                                                                                                                                                                                                                                                                                                                                                                                                                   |
|                         |                 | GSE 9171               | GSM231695,GSM231696,GSM231697,GSM231698,GSM231699,GSM231700,GSM231701,GSM231702,GSM231703,GSM231704,GSM231705,GSM231706,GSM231707                                                                                                                                                                                                                                                                                                                                                                                                                                                                                                                                                                                                                                                                                                                             |
|                         |                 | GSE 4290               | GSM97794,GSM97796,GSM97797,GSM97798,GSM97801,GSM97806,GSM97808,GSM97813,GSM97814,GSM97818,GSM97819,GSM97821,GSM97829,GSM97832,GSM97839,GSM97844,GSM97847,GSM97851,GSM97852,GSM97856,GSM97859,GSM97861,GSM97863,GSM97869,GSM97870,GSM97871,GSM97877,GSM97882,GSM97885,GSM97886,GSM97887,GSM97888,GSM97889,GSM97891,GSM97892,GSM97893,GSM97894,GSM97895,GSM97896,GSM97898,GSM97903,GSM97905,GSM97906,GSM97908,GSM97912,GSM97914,GSM97915,GSM97917,GSM97918,GSM97919,GSM97922,GSM97924,GSM97926,GSM97930,GSM97931,GSM97935,GSM97936,GSM97938,GSM97940,GSM97942,GSM97945,GSM97946,GSM97948,GSM97950,GSM97952,GSM97953,GSM97954,GSM97955,GSM97959,GSM97961,GSM97963,GSM97965,GSM97966,GSM97967,GSM97968,GSM97969,GSM97971                                                                                                                                          |

**Supplementary Table 2.** (Continued) GEO microarray sample IDs used in this study.

|                   |     |           |                                                                                                                                                                                                                                                                                                                                                                                                                                                                                                                                                                                                                                                                                                         |
|-------------------|-----|-----------|---------------------------------------------------------------------------------------------------------------------------------------------------------------------------------------------------------------------------------------------------------------------------------------------------------------------------------------------------------------------------------------------------------------------------------------------------------------------------------------------------------------------------------------------------------------------------------------------------------------------------------------------------------------------------------------------------------|
| Medulloblastoma   | MDL | GSE 10327 | GSM260959,GSM260960,GSM260961,GSM260962,GSM260963,GSM260964,GSM260965,GSM260966,GSM260967,GSM260968,GSM260969,GSM260970,GSM260971,GSM260972,GSM260973,GSM260974,GSM260975,GSM260976,GSM260977,GSM260978,GSM260979,GSM260981,GSM260982,GSM260983,GSM260984,GSM260985,GSM260986,GSM260987,GSM260988,GSM260989,GSM260990,GSM260991,GSM260992,GSM260993,GSM260994,GSM260995,GSM260996,GSM260997,GSM260998,GSM260999,GSM261000,GSM261001,GSM261002,GSM261003,GSM261004,GSM261005,GSM261006,GSM261007,GSM261008,GSM261009,GSM261010,GSM261011,GSM261012,GSM261013,GSM261014,GSM261015,GSM261016,GSM261017,GSM261018,GSM261019,GSM261020                                                                       |
|                   |     | GSE 12992 | GSM324062,GSM324063,GSM324064,GSM324065,GSM324066,GSM324067,GSM324068,GSM324069,GSM324082,GSM324083,GSM324084,GSM324085,GSM324090,GSM324091,GSM324092,GSM324093,GSM324104,GSM324111,GSM324112,GSM324113,GSM324115,GSM324119,GSM324137,GSM324138,GSM324139,GSM324140,GSM324141,GSM324508,GSM324512,GSM324513,GSM324514,GSM324515,GSM324516,GSM324517,GSM324526,GSM325233,GSM325278,GSM325280,GSM325281,GSM325282                                                                                                                                                                                                                                                                                         |
| Meningioma        | MNG | GSE 4780  | GSM108014,GSM108015,GSM108016,GSM108017,GSM108018,GSM107987,GSM107988,GSM107989,GSM107990,GSM107991,GSM107992,GSM107993,GSM107994,GSM107995,GSM107996,GSM107997,GSM107998,GSM107999,GSM108000,GSM108001,GSM108002,GSM108003,GSM108004,GSM108005,GSM108006,GSM108007,GSM108008,GSM108009,GSM108010,GSM108011,GSM108012,GSM108013,GSM108019,GSM108020,GSM108021,GSM108022,GSM108023,GSM108024,GSM108025,GSM108026,GSM108027,GSM108028,GSM108029,GSM108030,GSM108031,GSM108032,GSM108033,GSM108034,GSM108035,GSM108036,GSM108037,GSM108038,GSM108039,GSM108040,GSM108041,GSM108042,GSM108043,GSM108044,GSM108045,GSM108046,GSM108047,GSM108048                                                             |
|                   |     | GSE 9438  | GSM239770,GSM239771,GSM239772,GSM239773,GSM239774,GSM239775,GSM239776,GSM239777,GSM239778,GSM239779,GSM239780,GSM239781,GSM239782,GSM239783,GSM239784,GSM239785,GSM239786,GSM239787,GSM239788,GSM239789,GSM239790,GSM239791,GSM239792,GSM239793,GSM239794,GSM239795,GSM239796,GSM239797,GSM239798,GSM239799,GSM239800                                                                                                                                                                                                                                                                                                                                                                                   |
|                   |     | GSE 16581 | GSM416798,GSM416799,GSM416800,GSM416801,GSM416802,GSM416803,GSM416804,GSM416805,GSM416806,GSM416807,GSM416808,GSM416809,GSM416810,GSM416811,GSM416812,GSM416813,GSM416814,GSM416815,GSM416816,GSM416817,GSM416818,GSM416819,GSM416820,GSM416821,GSM416822,GSM416823,GSM416824,GSM416825,GSM416826,GSM416827,GSM416828,GSM416829,GSM416830,GSM416831,GSM416832,GSM416833,GSM416834,GSM416835,GSM416836,GSM416837,GSM416838,GSM416839,GSM416840,GSM416841,GSM416842,GSM416843,GSM416844,GSM416845,GSM416846,GSM416847,GSM416848,GSM416849,GSM416850,GSM416851,GSM416852,GSM416853,GSM416854,GSM416855,GSM416856,GSM416857,GSM416858,GSM416859,GSM416860,GSM416861,GSM416862,GSM416863,GSM416864,GSM416865 |
| Oligodendroglioma | OLG | GSE 4412  | GSM99458,GSM99460,GSM99510,GSM99512,GSM99514,GSM99516,GSM99518,GSM99520,GSM99522,GSM99570,GSM99598                                                                                                                                                                                                                                                                                                                                                                                                                                                                                                                                                                                                      |
|                   |     | GSE 4290  | GSM97799,GSM97822,GSM97823,GSM97824,GSM97830,GSM97831,GSM97835,GSM97838,GSM97841,GSM97842,GSM97845,GSM97854,GSM97857,GSM97860,GSM97862,GSM97864,GSM97865,GSM97866,GSM97867,GSM97868,GSM97872,GSM97873,GSM97874,GSM97875,GSM97876,GSM97880,GSM97881,GSM97883,GSM97884,GSM97897,GSM97900,GSM97901,GSM97902,GSM97904,GSM97907,GSM97909,GSM97911,GSM97923,GSM97925,GSM97928,GSM97929,GSM97933,GSM97934,GSM97944,GSM97947,GSM97949,GSM97956,GSM97962,GSM97964,GSM97970                                                                                                                                                                                                                                       |

**Supplementary Table 2.** (Continued) GEO microarray sample IDs used in this study.

|                       |        |           |                                                                                                                                                                                                                                                                                                                                                                                                                                                                                                                                                                                                                                                                                                                                                                                                                                                                                                                                                                                                                                                                                                                                                                                                                                                                                                                                                                                                                                                                                                                    |
|-----------------------|--------|-----------|--------------------------------------------------------------------------------------------------------------------------------------------------------------------------------------------------------------------------------------------------------------------------------------------------------------------------------------------------------------------------------------------------------------------------------------------------------------------------------------------------------------------------------------------------------------------------------------------------------------------------------------------------------------------------------------------------------------------------------------------------------------------------------------------------------------------------------------------------------------------------------------------------------------------------------------------------------------------------------------------------------------------------------------------------------------------------------------------------------------------------------------------------------------------------------------------------------------------------------------------------------------------------------------------------------------------------------------------------------------------------------------------------------------------------------------------------------------------------------------------------------------------|
|                       |        | GSE 12907 | GSM322969, GSM323054, GSM323523, GSM323524, GSM323525, GSM323526, GSM323527, GSM323528, GSM323529, GSM323530, GSM323531, GSM323554, GSM323555, GSM323557, GSM323558, GSM323559, GSM323560, GSM323561, GSM323562, GSM323563, GSM323564                                                                                                                                                                                                                                                                                                                                                                                                                                                                                                                                                                                                                                                                                                                                                                                                                                                                                                                                                                                                                                                                                                                                                                                                                                                                              |
| Pilocytic Astrocytoma | PA     | GSE 5675  | GSM132714, GSM132715, GSM132716, GSM132717, GSM132718, GSM132719, GSM132720, GSM132722, GSM132723, GSM132728, GSM132729, GSM132730, GSM132733, GSM132736, GSM132738, GSM132741, GSM132744, GSM132747, GSM132748, GSM132750, GSM132751, GSM132752, GSM132753, GSM132754, GSM132759, GSM132761, GSM132763, GSM132765, GSM132768, GSM132769, GSM132770, GSM132771, GSM132772, GSM132773, GSM132774, GSM132775, GSM132776, GSM132777, GSM132778, GSM132779, GSM132780                                                                                                                                                                                                                                                                                                                                                                                                                                                                                                                                                                                                                                                                                                                                                                                                                                                                                                                                                                                                                                                  |
| Normal Brain          | normal | GSE 3526  | GSM80565, GSM80566, GSM80567, GSM80568, GSM80569, GSM80570, GSM80571, GSM80572, GSM80573, GSM80574, GSM80575, GSM80581, GSM80585, GSM80586, GSM80587, GSM80591, GSM80592, GSM80593, GSM80594, GSM80595, GSM80596, GSM80597, GSM80598, GSM80599, GSM80600, GSM80601, GSM80616, GSM80617, GSM80618, GSM80619, GSM80620, GSM80621, GSM80622, GSM80623, GSM80626, GSM80627, GSM80628, GSM80636, GSM80637, GSM80638, GSM80639, GSM80640, GSM80641, GSM80642, GSM80643, GSM80644, GSM80645, GSM80646, GSM80647, GSM80650, GSM80651, GSM80652, GSM80653, GSM80660, GSM80661, GSM80662, GSM80663, GSM80664, GSM80665, GSM80666, GSM80667, GSM80668, GSM80669, GSM80670, GSM80671, GSM80675, GSM80676, GSM80677, GSM80678, GSM80679, GSM80680, GSM80681, GSM80682, GSM80683, GSM80684, GSM80690, GSM80691, GSM80692, GSM80693, GSM80699, GSM80700, GSM80701, GSM80702, GSM80703, GSM80704, GSM80705, GSM80706, GSM80708, GSM80709, GSM80711, GSM80713, GSM80714, GSM80715, GSM80721, GSM80722, GSM80723, GSM80724, GSM80744, GSM80745, GSM80746, GSM80747, GSM80752, GSM80754, GSM80756, GSM80760, GSM80761, GSM80762, GSM80763, GSM80766, GSM80767, GSM80772, GSM80773, GSM80774, GSM80775, GSM80800, GSM80801, GSM80802, GSM80803, GSM80804, GSM80817, GSM80818, GSM80819, GSM80830, GSM80831, GSM80832, GSM80833, GSM80834, GSM80835, GSM80836, GSM80837, GSM80838, GSM80839, GSM80840, GSM80841, GSM80847, GSM80848, GSM80849, GSM80851, GSM80852, GSM80855, GSM80858, GSM80859, GSM80860, GSM80861, GSM80862, GSM80863 |
|                       |        | GSE 7307  | GSM175842, GSM175843, GSM175844, GSM175845, GSM175849, GSM175850, GSM175851, GSM176153, GSM175852, GSM175853, GSM175854, GSM176048, GSM175855, GSM175856, GSM175857, GSM175858, GSM175846, GSM175847, GSM175848, GSM176150, GSM175871, GSM175872, GSM175873, GSM176059, GSM175874, GSM175875, GSM175876, GSM175877, GSM176215, GSM175901, GSM175902, GSM175903, GSM175904, GSM175987, GSM175988, GSM176174, GSM176175, GSM175989, GSM175990, GSM176170, GSM176171, GSM176172, GSM176173, GSM176178, GSM176179, GSM176180, GSM176181, GSM176182, GSM176183, GSM176184, GSM176185, GSM176161, GSM176162, GSM176163, GSM176164, GSM176056, GSM176073                                                                                                                                                                                                                                                                                                                                                                                                                                                                                                                                                                                                                                                                                                                                                                                                                                                                  |
