# Supplementary material for: Multi-study Integration of Brain Cancer Transcriptomes Reveals Organ-Level Molecular Signatures
Source: PubMed Central journal article supplement (PMC3723500; doi:10.1371/journal.pcbi.1003148), 2013-07-25
Supplement: pcbi.1003148.s008.pdf [file pcbi.1003148.s008.pdf]

**Table S3.** Node marker panel for brain cancer and normal transcriptome classification.

| Node # | Node phenotype classes    | Gene <i>i</i>   |                                                                               |                  |                     | Gene <i>j</i>   |                                                                    |                  |                     | <i>k</i> |
|--------|---------------------------|-----------------|-------------------------------------------------------------------------------|------------------|---------------------|-----------------|--------------------------------------------------------------------|------------------|---------------------|----------|
|        |                           | Gene symbol     | Gene name                                                                     | Chromosome locus | Affymetrix Probe ID | Gene symbol     | Gene name                                                          | Chromosome locus | Affymetrix Probe ID |          |
| 2      | EPN GBM MDL<br>MNG OLG PA | <i>PRPF40A</i>  | PRP40 pre-mRNA processing factor 40 homolog A (S. cerevisiae)                 | 2q23.3           | 218053_at           | <i>PURA</i>     | Purine-rich element binding protein A                              | 5q31             | 204021_s_at         | 1        |
| 3      | normal                    | <i>PURA</i>     | Purine-rich element binding protein A                                         | 5q31             | 204021_s_at         | <i>PRPF40A</i>  | PRP40 pre-mRNA processing factor 40 homolog A (S. cerevisiae)      | 2q23.3           | 218053_at           | 1        |
| 4      | EPN GBM MDL<br>OLG PA     | <i>NRCAM</i>    | Neuronal cell adhesion molecule                                               | 7q31             | 204105_s_at         | <i>ISLR</i>     | Immunoglobulin superfamily containing leucine-rich repeat          | 15q23-q24        | 207191_s_at         | 1        |
|        |                           | <i>IDH2</i>     | Isocitrate dehydrogenase 2 (NADP+), mitochondrial                             | 15q26.1          | 210046_s_at         | <i>GMDS</i>     | GDP-mannose 4,6-dehydratase                                        | 6p25             | 214106_s_at         |          |
| 5      | MNG                       | <i>ISLR</i>     | Immunoglobulin superfamily containing leucine-rich repeat                     | 15q23-q24        | 207191_s_at         | <i>NRCAM</i>    | Neuronal cell adhesion molecule                                    | 7q31             | 204105_s_at         | 1        |
| 6      | EPN GBM<br>OLG PA         | <i>SALL1</i>    | Sal-like 1 (Drosophila)                                                       | 16q12.1          | 206893_at           | <i>PAFAH1B3</i> | Platelet-activating factor acetylhydrolase 1b, catalytic subunit 3 | 19q13.1          | 203228_at           | 2        |
|        |                           | <i>SRI</i>      | Sorcin                                                                        | 7q21             | 208920_at           | <i>NBEA</i>     | Neurobeachin                                                       | 13q13            | 221207_s_at         |          |
|        |                           | <i>DDR1</i>     | Discoidin domain receptor tyrosine kinase 1                                   | 6p21.3           | 210749_x_at         | <i>TIA1</i>     | TIA1 cytotoxic granule-associated RNA binding protein              | 2p13             | 201447_at           |          |
|        |                           | <i>DDR1</i>     | Discoidin domain receptor tyrosine kinase 1                                   | 6p21.3           | 208779_x_at         | <i>MAB21L1</i>  | Mab-21-like 1 (C. elegans)                                         | 13q13            | 206163_at           |          |
|        |                           | <i>ITPKB</i>    | Inositol 1,4,5-trisphosphate 3-kinase B                                       | 1q42.13          | 203723_at           | <i>PDS5B</i>    | PDS5, regulator of cohesion maintenance, homolog B (S. cerevisiae) | 13q12.3          | 204742_s_at         |          |
| 7      | MDL                       | <i>PAFAH1B3</i> | Platelet-activating factor acetylhydrolase 1b, catalytic subunit 3            | 19q13.1          | 203228_at           | <i>SALL1</i>    | Sal-like 1 (Drosophila)                                            | 16q12.1          | 206893_at           | 4        |
|        |                           | <i>NBEA</i>     | Neurobeachin                                                                  | 13q13            | 221207_s_at         | <i>SRI</i>      | Sorcin                                                             | 7q21             | 208920_at           |          |
|        |                           | <i>TIA1</i>     | TIA1 cytotoxic granule-associated RNA binding protein                         | 2p13             | 201447_at           | <i>DDR1</i>     | Discoidin domain receptor tyrosine kinase 1                        | 6p21.3           | 210749_x_at         |          |
|        |                           | <i>MAB21L1</i>  | Mab-21-like 1 (C. elegans)                                                    | 13q13            | 206163_at           | <i>DDR1</i>     | Discoidin domain receptor tyrosine kinase 1                        | 6p21.3           | 208779_x_at         |          |
|        |                           | <i>PDS5B</i>    | PDS5, regulator of cohesion maintenance, homolog B (S. cerevisiae)            | 13q12.3          | 204742_s_at         | <i>ITPKB</i>    | Inositol 1,4,5-trisphosphate 3-kinase B                            | 1q42.13          | 203723_at           |          |
| 8      | EPN                       | <i>NUP62CL</i>  | Nucleoporin 62kDa C-terminal like                                             | Xq22.3           | 220520_s_at         | <i>ZNF280A</i>  | Zinc finger protein 280A                                           | 22q11.22         | 216034_at           | 2        |
|        |                           | <i>GALNS</i>    | Galactosamine (N-acetyl)-6-sulfate sulfatase                                  | 16q24.3          | 206335_at           | <i>WAS</i>      | Wiskott-Aldrich syndrome (eczema-thrombocytopenia)                 | Xp11.4-p11.21    | 38964_r_at          |          |
|        |                           | <i>CELSR1</i>   | Cadherin, EGF LAG seven-pass G-type receptor 1 (flamingo homolog, Drosophila) | 22q13.3          | 41660_at            | <i>OR10H3</i>   | Olfactory receptor, family 10, subfamily H, member 3               | 19p13.1          | 208520_at           |          |
|        |                           | <i>TLE4</i>     | Transducin-like enhancer of split 4 (E(sp1) homolog, Drosophila)              | 9q21.31          | 216997_x_at         | <i>OLIG2</i>    | Oligodendrocyte lineage transcription factor 2                     | 21q22.11         | 213824_at           |          |

**Table S3.** (Continued) Node marker panel for brain cancer and normal transcriptome classification.

| Node # | Node phenotype classes | Gene <i>i</i>  |                                                                                        |                  |                     | Gene <i>j</i>  |                                                                                    |                  |                     | <i>k</i> |
|--------|------------------------|----------------|----------------------------------------------------------------------------------------|------------------|---------------------|----------------|------------------------------------------------------------------------------------|------------------|---------------------|----------|
|        |                        | Gene symbol    | Gene name                                                                              | Chromosome locus | Affymetrix Probe ID | Gene symbol    | Gene name                                                                          | Chromosome locus | Affymetrix Probe ID |          |
| 9      | GBM OLG PA             | <i>ZNF280A</i> | Zinc finger protein 280A                                                               | 22q11.22         | 216034_at           | <i>NUP62CL</i> | Nucleoporin 62kDa C-terminal like                                                  | Xq22.3           | 220520_s_at         | 1        |
| 10     | GBM OLG                | <i>DDX27</i>   | DEAD (Asp-Glu-Ala-Asp) box polypeptide 27                                              | 20q13.13         | 215693_x_at         | <i>KCNMA1</i>  | Potassium large conductance calcium-activated channel, subfamily M, alpha member 1 | 10q22.3          | 221584_s_at         | 1        |
|        |                        | <i>COX7A2</i>  | Cytochrome c oxidase subunit VIIa polypeptide 2 (liver)                                | 6q12             | 217249_x_at         | <i>GNPTAB</i>  | N-acetylglucosamine-1-phosphate transferase, alpha and beta subunits               | 12q23.2          | 212959_s_at         |          |
| 11     | PA                     | <i>KCNMA1</i>  | Potassium large conductance calcium-activated channel, subfamily M, alpha member 1     | 10q22.3          | 221584_s_at         | <i>DDX27</i>   | DEAD (Asp-Glu-Ala-Asp) box polypeptide 27                                          | 20q13.13         | 215693_x_at         | 3        |
|        |                        | <i>GNPTAB</i>  | N-acetylglucosamine-1-phosphate transferase, alpha and beta subunits                   | 12q23.2          | 212959_s_at         | <i>NDUFS2</i>  | NADH dehydrogenase (ubiquinone) Fe-S protein 2, 49kDa (NADH-coenzyme Q reductase)  | 1q23             | 201966_at           |          |
|        |                        | <i>APOD</i>    | Apolipoprotein D                                                                       | 3q26.2-qter      | 201525_at           | <i>PPIA</i>    | Peptidylprolyl isomerase A (cyclophilin A)                                         | 7p13             | 211378_x_at         |          |
|        |                        | <i>CD59</i>    | CD59 molecule, complement regulatory protein                                           | 11p13            | 212463_at           | <i>SNRPB2</i>  | Small nuclear ribonucleoprotein polypeptide B                                      | 20p12.1          | 202505_at           |          |
|        |                        | <i>SEMA3E</i>  | Sema domain, immunoglobulin domain (Ig), short basic domain, secreted, (semaphorin) 3E | 7q21.11          | 206941_x_at         | <i>ADAMTS3</i> | ADAM metalloproteinase with thrombospondin type 1 motif, 3                         | 4q13.3           | 214913_at           |          |
|        |                        | <i>CD59</i>    | CD59 molecule, complement regulatory protein                                           | 11p13            | 200985_s_at         | <i>HINT1</i>   | Histidine triad nucleotide binding protein 1                                       | 5q31.2           | 208826_x_at         |          |
| 12     | GBM                    | <i>BAMBI</i>   | BMP and activin membrane-bound inhibitor homolog ( <i>Xenopus laevis</i> )             | 10p12.13-p11.2   | 203304_at           | <i>CIAPIN1</i> | Cytokine induced apoptosis inhibitor 1                                             | 16q13-q21        | 208968_s_at         | 1        |
|        |                        | <i>FLNA</i>    | Filamin A, alpha                                                                       | Xq28             | 214752_x_at         | <i>TNKS2</i>   | Tankyrase, TRF1-interacting ankyrin-related ADP-ribose polymerase 2                | 10q23.3          | 218228_s_at         |          |
|        |                        | <i>ITGB3BP</i> | Integrin beta 3 binding protein (beta3-endonexin)                                      | 1p31.3           | 205176_s_at         | <i>RB1CC1</i>  | RB1-inducible coiled-coil 1                                                        | 8q11             | 202034_x_at         |          |
| 13     | OLG                    | <i>DDX27</i>   | DEAD (Asp-Glu-Ala-Asp) box polypeptide 27                                              | 20q13.13         | 215693_x_at         | <i>TRIM8</i>   | Tripartite motif-containing 8                                                      | 10q24.3          | 221012_s_at         | 1        |
|        |                        | <i>LARP5</i>   | La ribonucleoprotein domain family, member 4B                                          | 10p15.3          | 208953_at           | <i>ANXA1</i>   | Annexin A1                                                                         | 9q12-q21.2       | 201012_at           |          |

**Node #:** Corresponds to numerical labels shown in the brain phenotype diagnostic hierarchy (Fig. 1). **Brain phenotype abbreviation (name):** EPN (Ependymoma), GBM (Glioblastoma multiforme), MDL (Medulloblastoma), MNG (Meningioma), normal (Normal brain), OLG (Oligodendroglioma), and PA (Pilocytic astrocytoma). **Gene *i* / Gene *j*:** the gene expressed higher and lower in the gene-pair, respectively, within each corresponding phenotype. **Gene name / Chromosome locus:** according to Entrez Gene. **Affymetrix Probe ID:** For both Affymetrix Human Genome U133A and U133Plus2.0 Arrays. ***k*:** The minimum number of gene-pair classifiers whose decision rule outcomes for a test sample are required to be 'true (= 1)' for the sample to be classified as the phenotype(s) of the corresponding node.
