# Supplementary material for: Multi-study Integration of Brain Cancer Transcriptomes Reveals Organ-Level Molecular Signatures
Source: PubMed Central journal article supplement (PMC3723500; doi:10.1371/journal.pcbi.1003148), 2013-07-25
Supplement: pcbi.1003148.s009.pdf [file pcbi.1003148.s009.pdf]

**Table S4.** Decision-tree marker panel for brain cancer and normal transcriptome classification.

| Gene <i>i</i>  |                     | Gene <i>j</i> |                     | Brain phenotype binary signature |     |     |     |     |    |        |
|----------------|---------------------|---------------|---------------------|----------------------------------|-----|-----|-----|-----|----|--------|
| Gene symbol    | Affymetrix Probe ID | Gene symbol   | Affymetrix Probe ID | EPN                              | GBM | MDL | MNG | OLG | PA | normal |
| <i>PRPF40A</i> | 218053_at           | <i>PURA</i>   | 204021_s_at         | 1                                | 1   | 1   | 1   | 1   | 1  | 0      |
| <i>NRCAM</i>   | 204105_s_at         | <i>ISLR</i>   | 207191_s_at         | 1                                | 1   | 1   | 0   | 1   | 1  | -      |
| <i>SRI</i>     | 208920_at           | <i>NBEA</i>   | 221207_s_at         | 1                                | 1   | 0   | -   | 1   | 1  | -      |
| <i>NUP62CL</i> | 220520_s_at         | <i>OR10H3</i> | 208520_at           | 1                                | 0   | -   | -   | 0   | 0  | -      |
| <i>DDX27</i>   | 215693_x_at         | <i>KCNMA1</i> | 221584_s_at         | -                                | 1   | -   | -   | 1   | 0  | -      |
| <i>FLNA</i>    | 214752_x_at         | <i>TNKS2</i>  | 218228_s_at         | -                                | 1   | -   | -   | 0   | -  | -      |

For each classifier decision rule (i.e. Is Gene *i* > Gene *j* ?), 1 and 0 delineates ‘true’ and ‘false’, respectively, and ‘-’ denotes that the outcome is not used for classification. The vertical binary pattern under each class label corresponds to a phenotype-specific molecular signature.
