# Supplementary material for: Multi-study Integration of Brain Cancer Transcriptomes Reveals Organ-Level Molecular Signatures
Source: PubMed Central journal article supplement (PMC3723500; doi:10.1371/journal.pcbi.1003148), 2013-07-25
Supplement: pcbi.1003148.s010.pdf [file pcbi.1003148.s010.pdf]

**Table S5.** Summary of expression differences between genes-pair classifiers.

| Node # | Node phenotype classes    | Sample number | Gene <i>i</i>   |                     | Gene <i>j</i>   |                     | <i>k</i> | Mean     | St. dev. | Max.     | Min.      | Median   |
|--------|---------------------------|---------------|-----------------|---------------------|-----------------|---------------------|----------|----------|----------|----------|-----------|----------|
|        |                           |               | Gene symbol     | Affymetrix Probe ID | Gene symbol     | Affymetrix Probe ID |          |          |          |          |           |          |
| 2      | EPN GBM MDL<br>MNG OLG PA | 718           | <i>PRPF40A</i>  | 218053_at           | <i>PURA</i>     | 204021_s_at         | 1        | 4,314.7  | 1,685.5  | 10,889.0 | -2,593.0  | 4,370.5  |
| 3      | normal                    | 203           | <i>PURA</i>     | 204021_s_at         | <i>PRPF40A</i>  | 218053_at           | 1        | 1,793.5  | 1,122.2  | 9,249.0  | 176.0     | 1,591.0  |
| 4      | EPN GBM MDL<br>OLG PA     | 557           | <i>NRCAM</i>    | 204105_s_at         | <i>ISLR</i>     | 207191_s_at         | 1        | 10,376.0 | 2,475.5  | 13,271.0 | -7,491.0  | 11,283.0 |
|        |                           |               | <i>IDH2</i>     | 210046_s_at         | <i>GMDS</i>     | 214106_s_at         |          | 5,153.1  | 1,647.1  | 9,264.0  | -6,662.0  | 5,238.0  |
| 5      | MNG                       | 161           | <i>ISLR</i>     | 207191_s_at         | <i>NRCAM</i>    | 204105_s_at         | 1        | 8,568.9  | 2,449.9  | 11,884.0 | -11,674.0 | 8,977.0  |
| 6      | EPN GBM<br>OLG PA         | 456           | <i>SALL1</i>    | 206893_at           | <i>PAFAH1B3</i> | 203228_at           | 2        | 8,239.6  | 2,767.1  | 12,574.0 | -9,364.0  | 8,728.0  |
|        |                           |               | <i>SRI</i>      | 208920_at           | <i>NBEA</i>     | 221207_s_at         |          | 4,513.8  | 2,001.8  | 10,692.0 | -401.0    | 4,536.5  |
|        |                           |               | <i>DDR1</i>     | 210749_x_at         | <i>TIA1</i>     | 201447_at           |          | 4,227.7  | 1,528.7  | 9,580.0  | -3,227.0  | 4,536.0  |
|        |                           |               | <i>DDR1</i>     | 208779_x_at         | <i>MAB21L1</i>  | 206163_at           |          | 9,514.9  | 2,223.0  | 13,251.0 | -1,759.0  | 10,267.0 |
|        |                           |               | <i>ITPKB</i>    | 203723_at           | <i>PDS5B</i>    | 204742_s_at         |          | 7,051.7  | 2,551.4  | 11,373.0 | -1,524.0  | 7,478.5  |
| 7      | MDL                       | 101           | <i>PAFAH1B3</i> | 203228_at           | <i>SALL1</i>    | 206893_at           | 4        | 8,729.6  | 2,776.6  | 12,096.0 | 9.0       | 9,341.0  |
|        |                           |               | <i>NBEA</i>     | 221207_s_at         | <i>SRI</i>      | 208920_at           |          | 3,858.3  | 2,074.7  | 8,440.0  | -28.0     | 3,715.0  |
|        |                           |               | <i>TIA1</i>     | 201447_at           | <i>DDR1</i>     | 210749_x_at         |          | 3,476.4  | 1,618.5  | 8,709.0  | 27.0      | 3,481.0  |
|        |                           |               | <i>MAB21L1</i>  | 206163_at           | <i>DDR1</i>     | 208779_x_at         |          | 4,510.6  | 1,845.9  | 8,771.0  | -5,415.0  | 4,562.0  |
| 8      | EPN                       | 102           | <i>PDS5B</i>    | 204742_s_at         | <i>ITPKB</i>    | 203723_at           | 2        | 5,495.4  | 2,515.1  | 11,625.0 | -2,026.0  | 5,538.0  |
|        |                           |               | <i>NUP62CL</i>  | 220520_s_at         | <i>ZNF280A</i>  | 216034_at           |          | 5,676.0  | 3,444.6  | 11,512.0 | -830.0    | 6,079.5  |
|        |                           |               | <i>GALNS</i>    | 206335_at           | <i>WAS</i>      | 38964_r_at          |          | 3,952.7  | 2,095.5  | 7,831.0  | -1,216.0  | 4,098.5  |
|        |                           |               | <i>CELSR1</i>   | 41660_at            | <i>OR10H3</i>   | 208520_at           |          | 4,959.8  | 2,798.6  | 11,365.0 | -1,367.0  | 5,058.5  |
|        |                           |               | <i>TLE4</i>     | 216997_x_at         | <i>OLIG2</i>    | 213824_at           |          | 3,423.4  | 2,401.5  | 9,765.0  | -3,239.0  | 3,386.5  |

**Node #:** Corresponds to numerical labels shown in the brain phenotype diagnostic hierarchy (Fig. 1). **Brain phenotype abbreviation (name):** EPN (Ependymoma), GBM (Glioblastoma multiforme), MDL (Medulloblastoma), MNG (Meningioma), normal (Normal brain), OLG (Oligodendroglioma), and PA (Pilocytic astrocytoma). **Sample number:** Number of total samples in classes of respective Node #. **Gene *i* / Gene *j*:** the gene expressed higher and lower in the gene-pair, respectively, within each corresponding phenotype. **Gene name / Chromosome locus:** according to Entrez Gene. **Affymetrix Probe ID:** For both Affymetrix Human Genome U133A and U133Plus2.0 Arrays. ***k*:** The minimum number of gene-pair classifiers whose decision rule outcomes for a test sample are required to be 'true (= 1)' for the sample to be classified as the phenotype(s) of the corresponding node. Ranked expression differences of each gene pair (i.e. Rank\_gene\_*i* – Rank\_gene\_*j*) were calculated for each sample, and **Mean, St. dev., Max., Min., and Median** were found across all samples within classes of respective Node #.

**Table S5.** (Continued) Summary of expression differences between genes-pair classifiers.

| Node # | Node phenotype classes | Sample number | Gene <i>i</i> |                     | Gene <i>j</i> |                     | <i>k</i> | Mean    | St. dev. | Max.    | Min.     | Median  |
|--------|------------------------|---------------|---------------|---------------------|---------------|---------------------|----------|---------|----------|---------|----------|---------|
|        |                        |               | Gene symbol   | Affymetrix Probe ID | Gene symbol   | Affymetrix Probe ID |          |         |          |         |          |         |
| 9      | GBM OLG PA             | 354           | ZNF280A       | 216034_at           | NUP62CL       | 220520_s_at         | 1        | 1,392.5 | 673.9    | 3,211.0 | -4,279.0 | 1,354.0 |
| 10     | GBM OLG                | 292           | DDX27         | 215693_x_at         | KCNMA1        | 221584_s_at         | 1        | 2,144.8 | 1,366.3  | 6,451.0 | -1,681.0 | 2,124.5 |
|        |                        |               | COX7A2        | 217249_x_at         | GNPTAB        | 212959_s_at         |          | 1,777.2 | 1,106.8  | 5,125.0 | -2,040.0 | 1,664.0 |
| 11     | PA                     | 62            | KCNMA1        | 221584_s_at         | DDX27         | 215693_x_at         | 3        | 1,832.2 | 942.5    | 3,558.0 | 105.0    | 1,853.0 |
|        |                        |               | GNPTAB        | 212959_s_at         | NDUFS2        | 201966_at           |          | 1,149.7 | 737.3    | 3,061.0 | -825.0   | 1,112.5 |
|        |                        |               | APOD          | 201525_at           | PPIA          | 211378_x_at         |          | 121.4   | 117.3    | 494.0   | -426.0   | 104.5   |
|        |                        |               | CD59          | 212463_at           | SNRNP2        | 202505_at           |          | 1,169.1 | 1,038.0  | 3,989.0 | -2,247.0 | 1,059.0 |
|        |                        |               | SEMA3E        | 206941_x_at         | ADAMTS3       | 214913_at           |          | 4,376.3 | 3,026.1  | 8,551.0 | -8,061.0 | 5,194.5 |
|        |                        |               | CD59          | 200985_s_at         | HINT1         | 208826_x_at         |          | 388.5   | 422.5    | 1,586.0 | -270.0   | 214.5   |
| 12     | GBM                    | 231           | BAMBI         | 203304_at           | CIAPIN1       | 208968_s_at         | 1        | 1,976.4 | 975.1    | 3,802.0 | -594.0   | 1,984.0 |
|        |                        |               | FLNA          | 214752_x_at         | TNKS2         | 218228_s_at         |          | 3,238.8 | 2,804.3  | 9,691.0 | -4,133.0 | 3,557.0 |
| 13     | OLG                    | 61            | ITGB3BP       | 205176_s_at         | RB1CC1        | 202034_x_at         | 1        | 1,793.7 | 2,357.9  | 8,665.0 | -4,597.0 | 1,560.0 |
|        |                        |               | DDX27         | 215693_x_at         | TRIM8         | 221012_s_at         |          | 1,819.1 | 1,492.6  | 6,083.0 | -1,099.0 | 1,636.0 |
| 13     | OLG                    | 61            | LARP5         | 208953_at           | ANXA1         | 201012_at           | 1        | 2,843.4 | 3,463.0  | 9,055.0 | -5,831.0 | 2,788.0 |

**Node #:** Corresponds to numerical labels shown in the brain phenotype diagnostic hierarchy (Fig. 1). **Brain phenotype abbreviation (name):** EPN (Ependymoma), GBM (Glioblastoma multiforme), MDL (Medulloblastoma), MNG (Meningioma), normal (Normal brain), OLG (Oligodendroglioma), and PA (Pilocytic astrocytoma). **Sample number:** Number of total samples in classes of respective Node #. **Gene *i* / Gene *j*:** the gene expressed higher and lower in the gene-pair, respectively, within each corresponding phenotype. **Gene name / Chromosome locus:** according to Entrez Gene. **Affymetrix Probe ID:** For both Affymetrix Human Genome U133A and U133Plus2.0 Arrays. ***k*:** The minimum number of gene-pair classifiers whose decision rule outcomes for a test sample are required to be 'true (= 1)' for the sample to be classified as the phenotype(s) of the corresponding node. Ranked expression differences of each gene pair (i.e. Rank\_gene\_*i* – Rank\_gene\_*j*) were calculated for each sample, and **Mean, St. dev., Max., Min., and Median** were found across all samples within classes of respective Node #.
