# Supplementary material for: Multi-study Integration of Brain Cancer Transcriptomes Reveals Organ-Level Molecular Signatures
Source: PubMed Central journal article supplement (PMC3723500; doi:10.1371/journal.pcbi.1003148), 2013-07-25
Supplement: pcbi.1003148.s011.pdf [file pcbi.1003148.s011.pdf]

**Table S6. (Continued) Hold-one-lab-in validation accuracies of glioblastoma signatures.**

|              |        |               |               |        |        |        |       |
|--------------|--------|---------------|---------------|--------|--------|--------|-------|
| GSE4412 (59) | UC     | EPN           | GBM           | MDL    | MNG    | PA     | Total |
|              | 35.59% | 13.56%        | <b>0.00%</b>  | 1.69%  | 5.08%  | 44.07% | 59    |
|              | 21     | 8             | 0             | 1      | 3      | 26     | 59    |
|              |        |               |               |        |        |        |       |
| GSE4271 (76) | UC     | EPN           | GBM           | MDL    | MNG    | PA     | Total |
|              | 19.74% | 38.16%        | <b>0.00%</b>  | 6.58%  | 3.95%  | 31.58% | 76    |
|              | 15     | 29            | 0             | 5      | 3      | 24     | 76    |
| GSE8692 (6)  | UC     | GBM           | MNG           | PA     | Total  |        |       |
|              | 66.67% | <b>0.00%</b>  | 16.67%        | 16.67% | 6      |        |       |
|              | 4      | 0             | 1             | 1      | 6      |        |       |
| GSE4290 (77) | UC     | EPN           | GBM           | MDL    | PA     | normal | Total |
|              | 10.39% | 40.26%        | <b>0.00%</b>  | 1.30%  | 46.75% | 1.30%  | 77    |
|              | 8      | 31            | 0             | 1      | 36     | 1      | 77    |
| GSE4412 (59) | UC     | GBM           | NB            | PA     | normal | Total  |       |
|              | 5.08%  | <b>52.54%</b> | 27.12%        | 13.56% | 1.69%  | 59     |       |
|              | 3      | 31            | 16            | 8      | 1      | 59     |       |
| GSE4271 (76) | UC     | EPN           | GBM           | MDL    | OLG    | PA     | Total |
|              | 1.32%  | 1.32%         | <b>60.53%</b> | 3.95%  | 15.79% | 17.11% | 76    |
|              | 1      | 1             | 46            | 3      | 12     | 13     | 76    |
| GSE8692 (6)  | UC     | GBM           | NB            | PA     | Total  |        |       |
|              | 33.33% | <b>16.67%</b> | 16.67%        | 33.33% | 6      |        |       |
|              | 2      | 1             | 1             | 2      | 6      |        |       |
| GSE9171 (13) | UC     | GBM           | Total         |        |        |        |       |
|              | 7.69%  | <b>92.31%</b> | 13            |        |        |        |       |
|              | 1      | 12            | 13            |        |        |        |       |
