# Supplementary material for: Multi-study Integration of Brain Cancer Transcriptomes Reveals Organ-Level Molecular Signatures
Source: PubMed Central journal article supplement (PMC3723500; doi:10.1371/journal.pcbi.1003148), 2013-07-25
Supplement: pcbi.1003148.s012.pdf [file pcbi.1003148.s012.pdf]

**Table S7.** Hold-one-lab-in (H1LI) and leave-one-lab-out (L1LO) validation accuracies of glioblastoma signatures when training data were constrained to 50 total samples.

| Method | GBM training set<br>(50 samples)      | GBM test set | GBM prediction   |          | Average<br>performance |
|--------|---------------------------------------|--------------|------------------|----------|------------------------|
|        |                                       |              | Average accuracy | St. dev. |                        |
| H1LI   | GSE4412                               | GSE4271      | 40.26%           | 14.98%   | 36.39%                 |
|        |                                       | GSE8692      | 96.67%           | 7.03%    |                        |
|        |                                       | GSE9171      | 6.15%            | 3.24%    |                        |
|        |                                       | GSE4290      | 2.47%            | 2.10%    |                        |
|        | GSE4271                               | GSE4412      | 58.98%           | 21.64%   | 63.89%                 |
|        |                                       | GSE8692      | 74.00%           | 11.43%   |                        |
|        |                                       | GSE9171      | 73.08%           | 10.41%   |                        |
|        |                                       | GSE4290      | 49.48%           | 26.56%   |                        |
|        | GSE4290                               | GSE4412      | 38.47%           | 10.23%   | 40.66%                 |
|        |                                       | GSE4271      | 43.13%           | 16.12%   |                        |
|        |                                       | GSE8692      | 23.33%           | 9.08%    |                        |
|        |                                       | GSE9171      | 57.70%           | 16.79%   |                        |
| L1LO   | GSE4271, GSE8692,<br>GSE9171, GSE4290 | GSE4412      | 82.20%           | 10.39%   | 69.72%                 |
|        | GSE4412, GSE8692,<br>GSE9171, GSE4290 | GSE4271      | 54.87%           | 7.18%    |                        |
|        | GSE4412, GSE4271,<br>GSE8692, GSE9171 | GSE4290      | 72.08%           | 15.29%   |                        |

H1LI and L1LO validations were performed ten times for each category of training data. In each validation trial, 50 samples were randomly selected from the single microarray dataset (for H1LI) or from the multi-study, combined dataset (for L1LO).
