# Supplementary material for: Multi-study Integration of Brain Cancer Transcriptomes Reveals Organ-Level Molecular Signatures
Source: PubMed Central journal article supplement (PMC3723500; doi:10.1371/journal.pcbi.1003148), 2013-07-25
Supplement: pcbi.1003148.s013.pdf [file pcbi.1003148.s013.pdf]

**Table S8.** Ten-fold cross-validation accuracies when only the node marker panel was required to reach unique diagnoses.

| Phenotype | Total samples | Sample size (%) | Accuracy (%) |
|-----------|---------------|-----------------|--------------|
| EPN       | 102           | 93.1            | 95.8         |
| GBM       | 231           | 88.9            | 92.7         |
| MDL       | 101           | 95.0            | 95.8         |
| MNG       | 161           | 98.8            | 97.5         |
| OLG       | 61            | 77.0            | 74.5         |
| PA        | 62            | 90.3            | 96.4         |
| Normal    | 203           | 97.9            | 99.5         |
| Average   | -             | 91.6            | 93.2         |

**Sample size:** Average proportion of total samples that reached unique diagnoses via node marker panel. **Accuracy:** Reflects average performance in ten-fold cross-validation conducted ten times.
