# Supplementary material for: Multi-study Integration of Brain Cancer Transcriptomes Reveals Organ-Level Molecular Signatures
Source: PubMed Central journal article supplement (PMC3723500; doi:10.1371/journal.pcbi.1003148), 2013-07-25
Supplement: pcbi.1003148.s015.pdf [file pcbi.1003148.s015.pdf]

**Table S10.** Ten-fold cross-validation accuracies of gene-pair classifiers composed of genes that encode extracellular products.

|                  |        | Predicted phenotype (%) <sup>a</sup> |             |             |             |             |             |             | total |                 |
|------------------|--------|--------------------------------------|-------------|-------------|-------------|-------------|-------------|-------------|-------|-----------------|
|                  |        | EPN                                  | GBM         | MDL         | MNG         | OLG         | PA          | normal      |       | UC <sup>b</sup> |
| Actual phenotype | EPN    | <b>83.3</b>                          | 2.9         | 4.9         | 4.9         | 2.0         | 1.0         | 0.0         | 1.0   | 102             |
|                  | GBM    | 2.2                                  | <b>72.3</b> | 0.4         | 1.3         | 20.3        | 0.9         | 0.0         | 2.6   | 231             |
|                  | MDL    | 1.0                                  | 1.0         | <b>94.1</b> | 1.0         | 2.0         | 0.0         | 0.0         | 1.0   | 101             |
|                  | MNG    | 0.0                                  | 1.2         | 0.6         | <b>97.5</b> | 0.0         | 0.0         | 0.0         | 0.6   | 161             |
|                  | OLG    | 0.0                                  | 16.4        | 0.0         | 0.0         | <b>75.4</b> | 3.3         | 1.6         | 3.3   | 61              |
|                  | PA     | 1.6                                  | 1.6         | 0.0         | 0.0         | 3.2         | <b>91.9</b> | 0.0         | 1.6   | 62              |
|                  | normal | 0.0                                  | 1.0         | 0.0         | 0.0         | 1.5         | 0.0         | <b>96.6</b> | 1.0   | 203             |

<sup>a</sup>Accuracies reflect average performance in ten-fold cross-validation conducted ten times. The main diagonal gives the average classification accuracy of each class (bold), and the off-diagonal elements show the erroneous predictions.

<sup>b</sup>UC (Unclassified samples). When using the node classifiers, expression profiles that did not exert a signature of any phenotype (i.e., did not percolate down to at least one positive terminal node) were rejected from classification. In this case, the Unclassified sample is treated as a misclassification.
